# Supplementary figures and images for: A switchable light-input, light-output system modelled and constructed in yeast
Source: Springer Nature journal article supplement (doi:10.1186/1754-1611-3-15), 2009-09-17

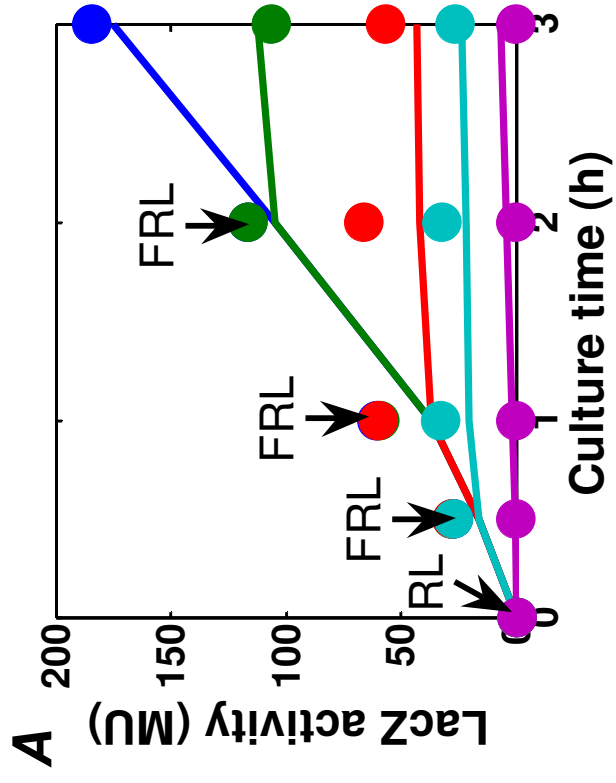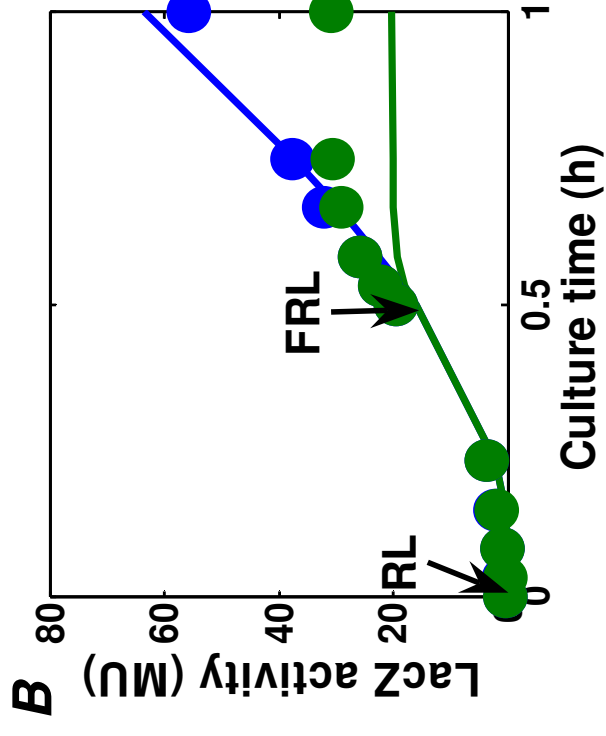

Supplement: Additional file 4 [file 1754-1611-3-15-s4.pdf]

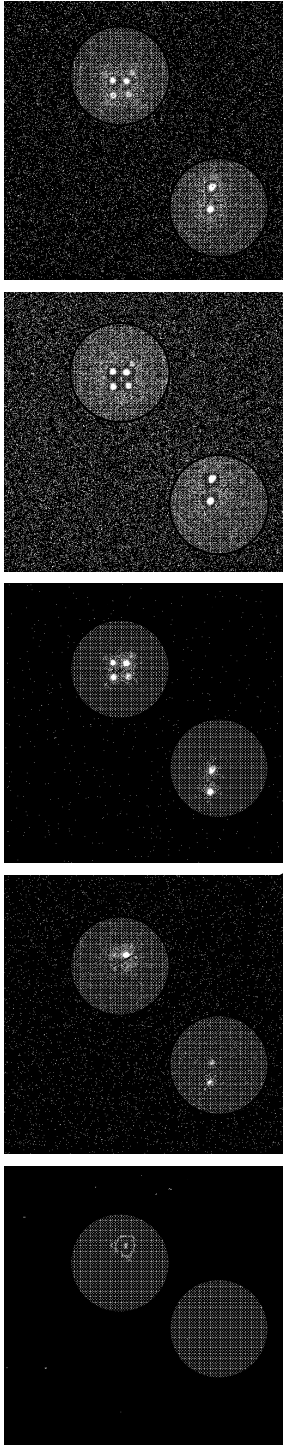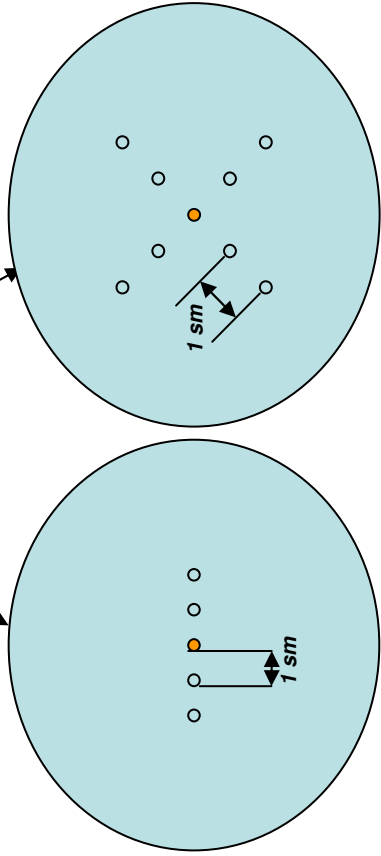

Supplement: Additional file 5 [file 1754-1611-3-15-s5.pdf]
